# Supplementary material for: Ultrasound-guided microwave ablation for giant breast leiomyoma: A case report
Source: PubMed Central journal article supplement (PMC9893409; doi:10.3389/fonc.2023.1095891), 2023-01-19

First visit

Contrast-enhanced ultrasound and needle biopsy were performed

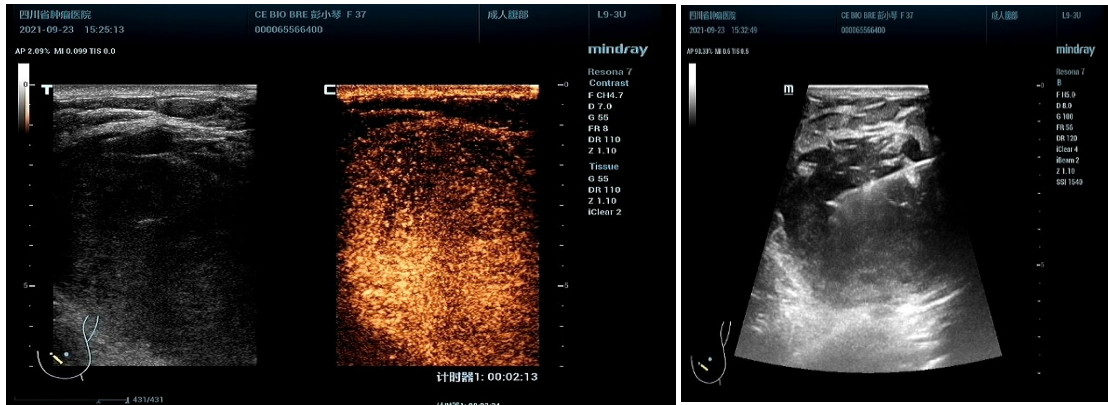

MRI

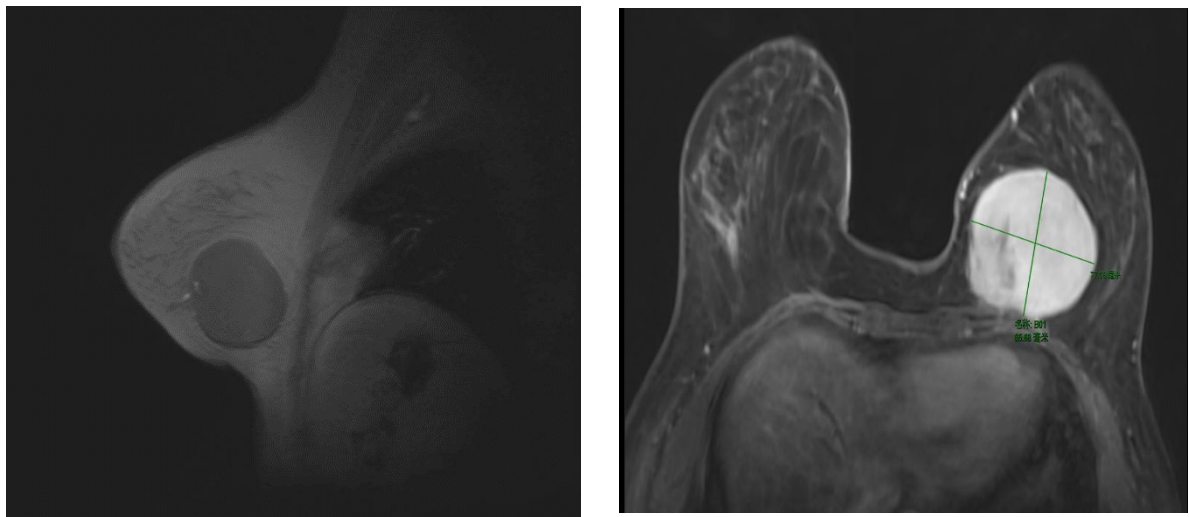

Pathology

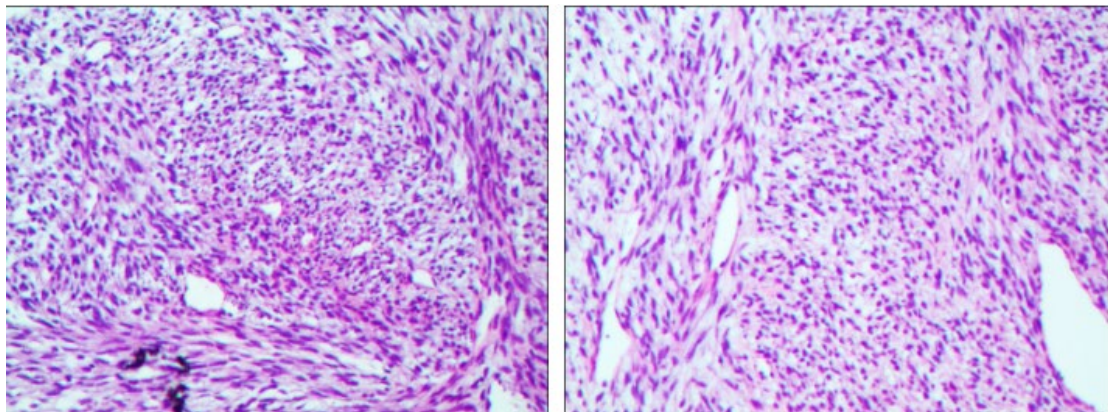

# microwave ablation

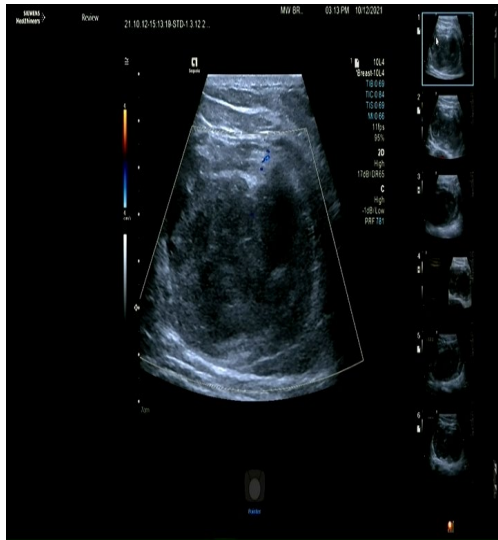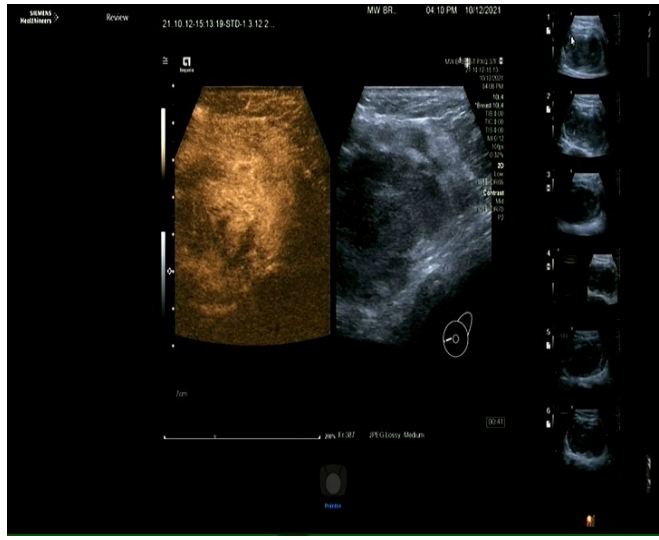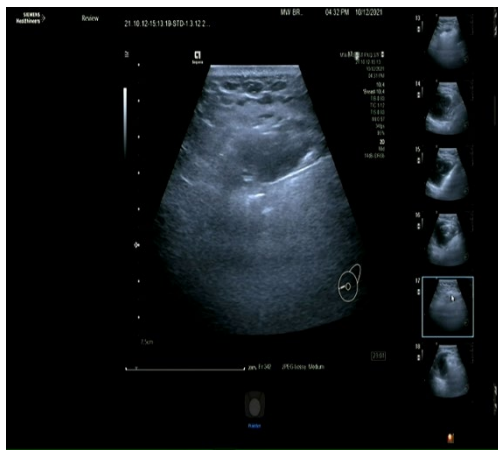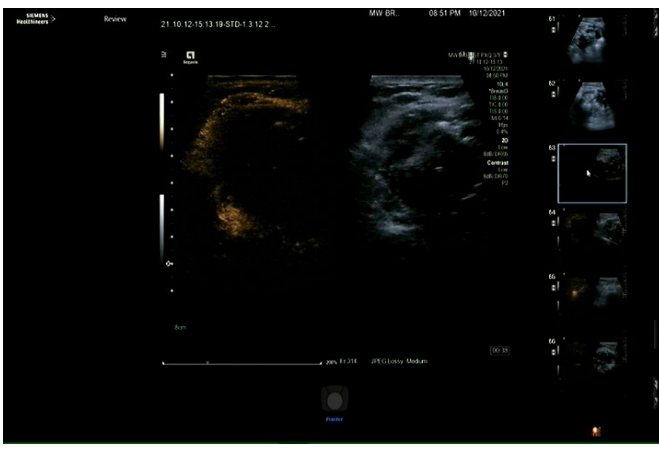

# Postoperative breast appearance

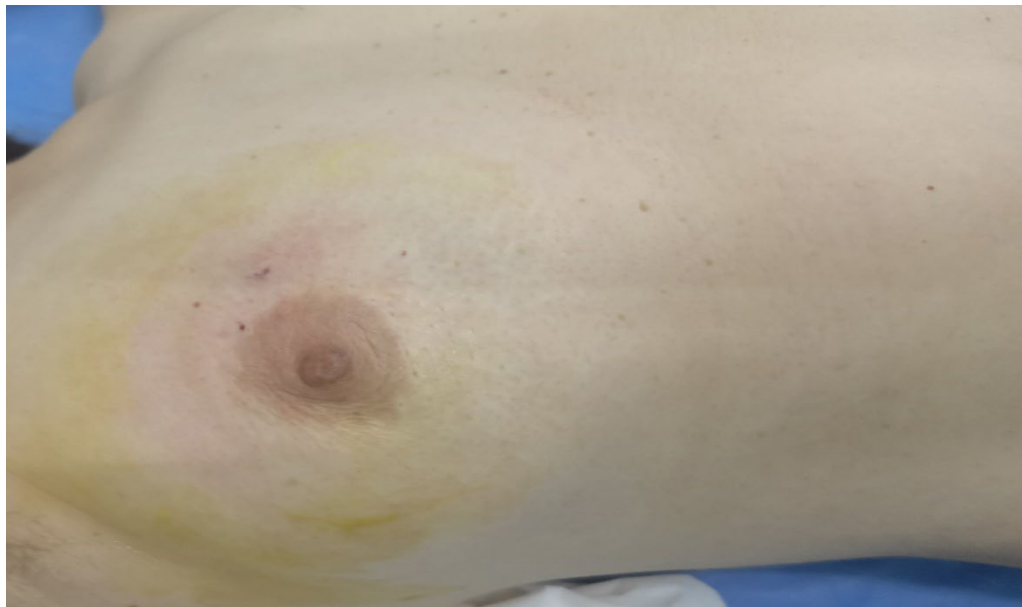

The patients were followed up after 3 months

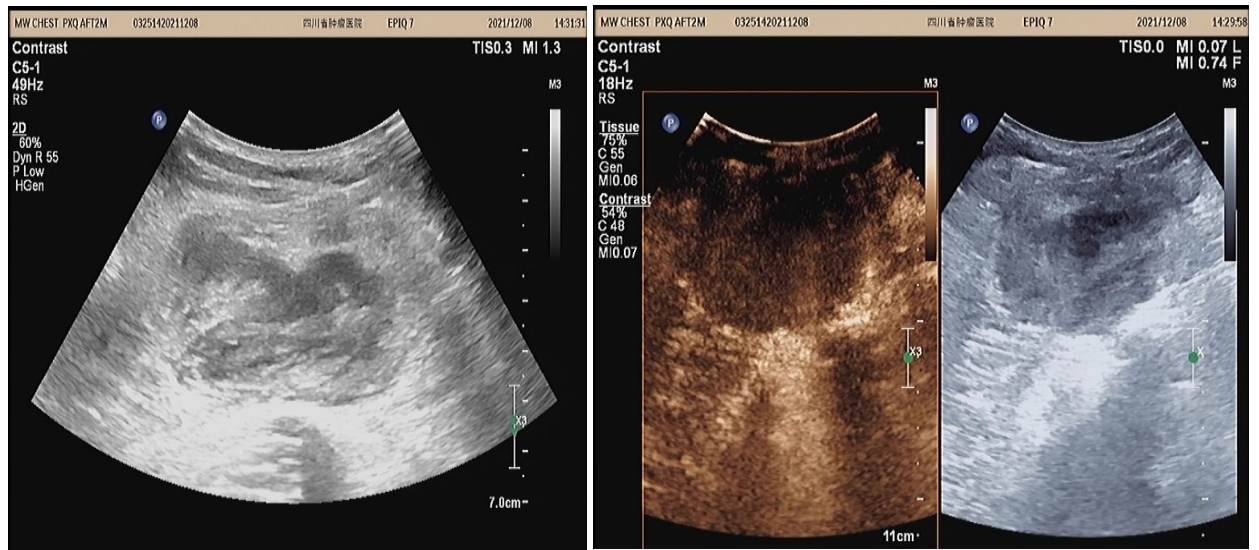

The patients were followed up after 10 months

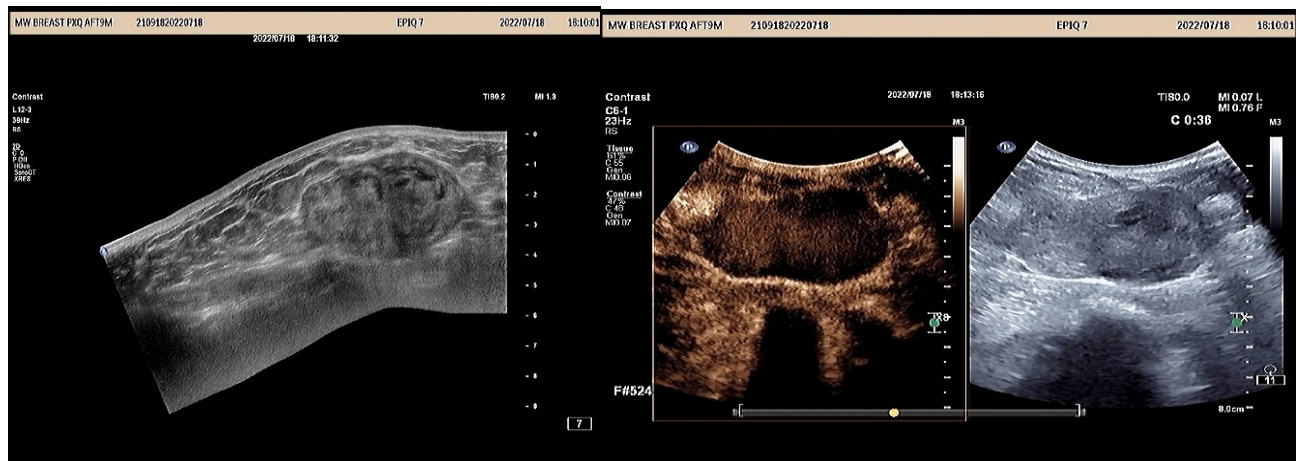

Supplement: Image_1.pdf [file Image_1.pdf]
